# Supplementary material for: A Comparative Genomic and Transcriptomic Survey Provides Novel Insights into N-Acetylserotonin Methyltransferase (ASMT) in Fish
Source: MDPI journal article supplement (doi:10.3390/molecules22101653), 2017-10-02

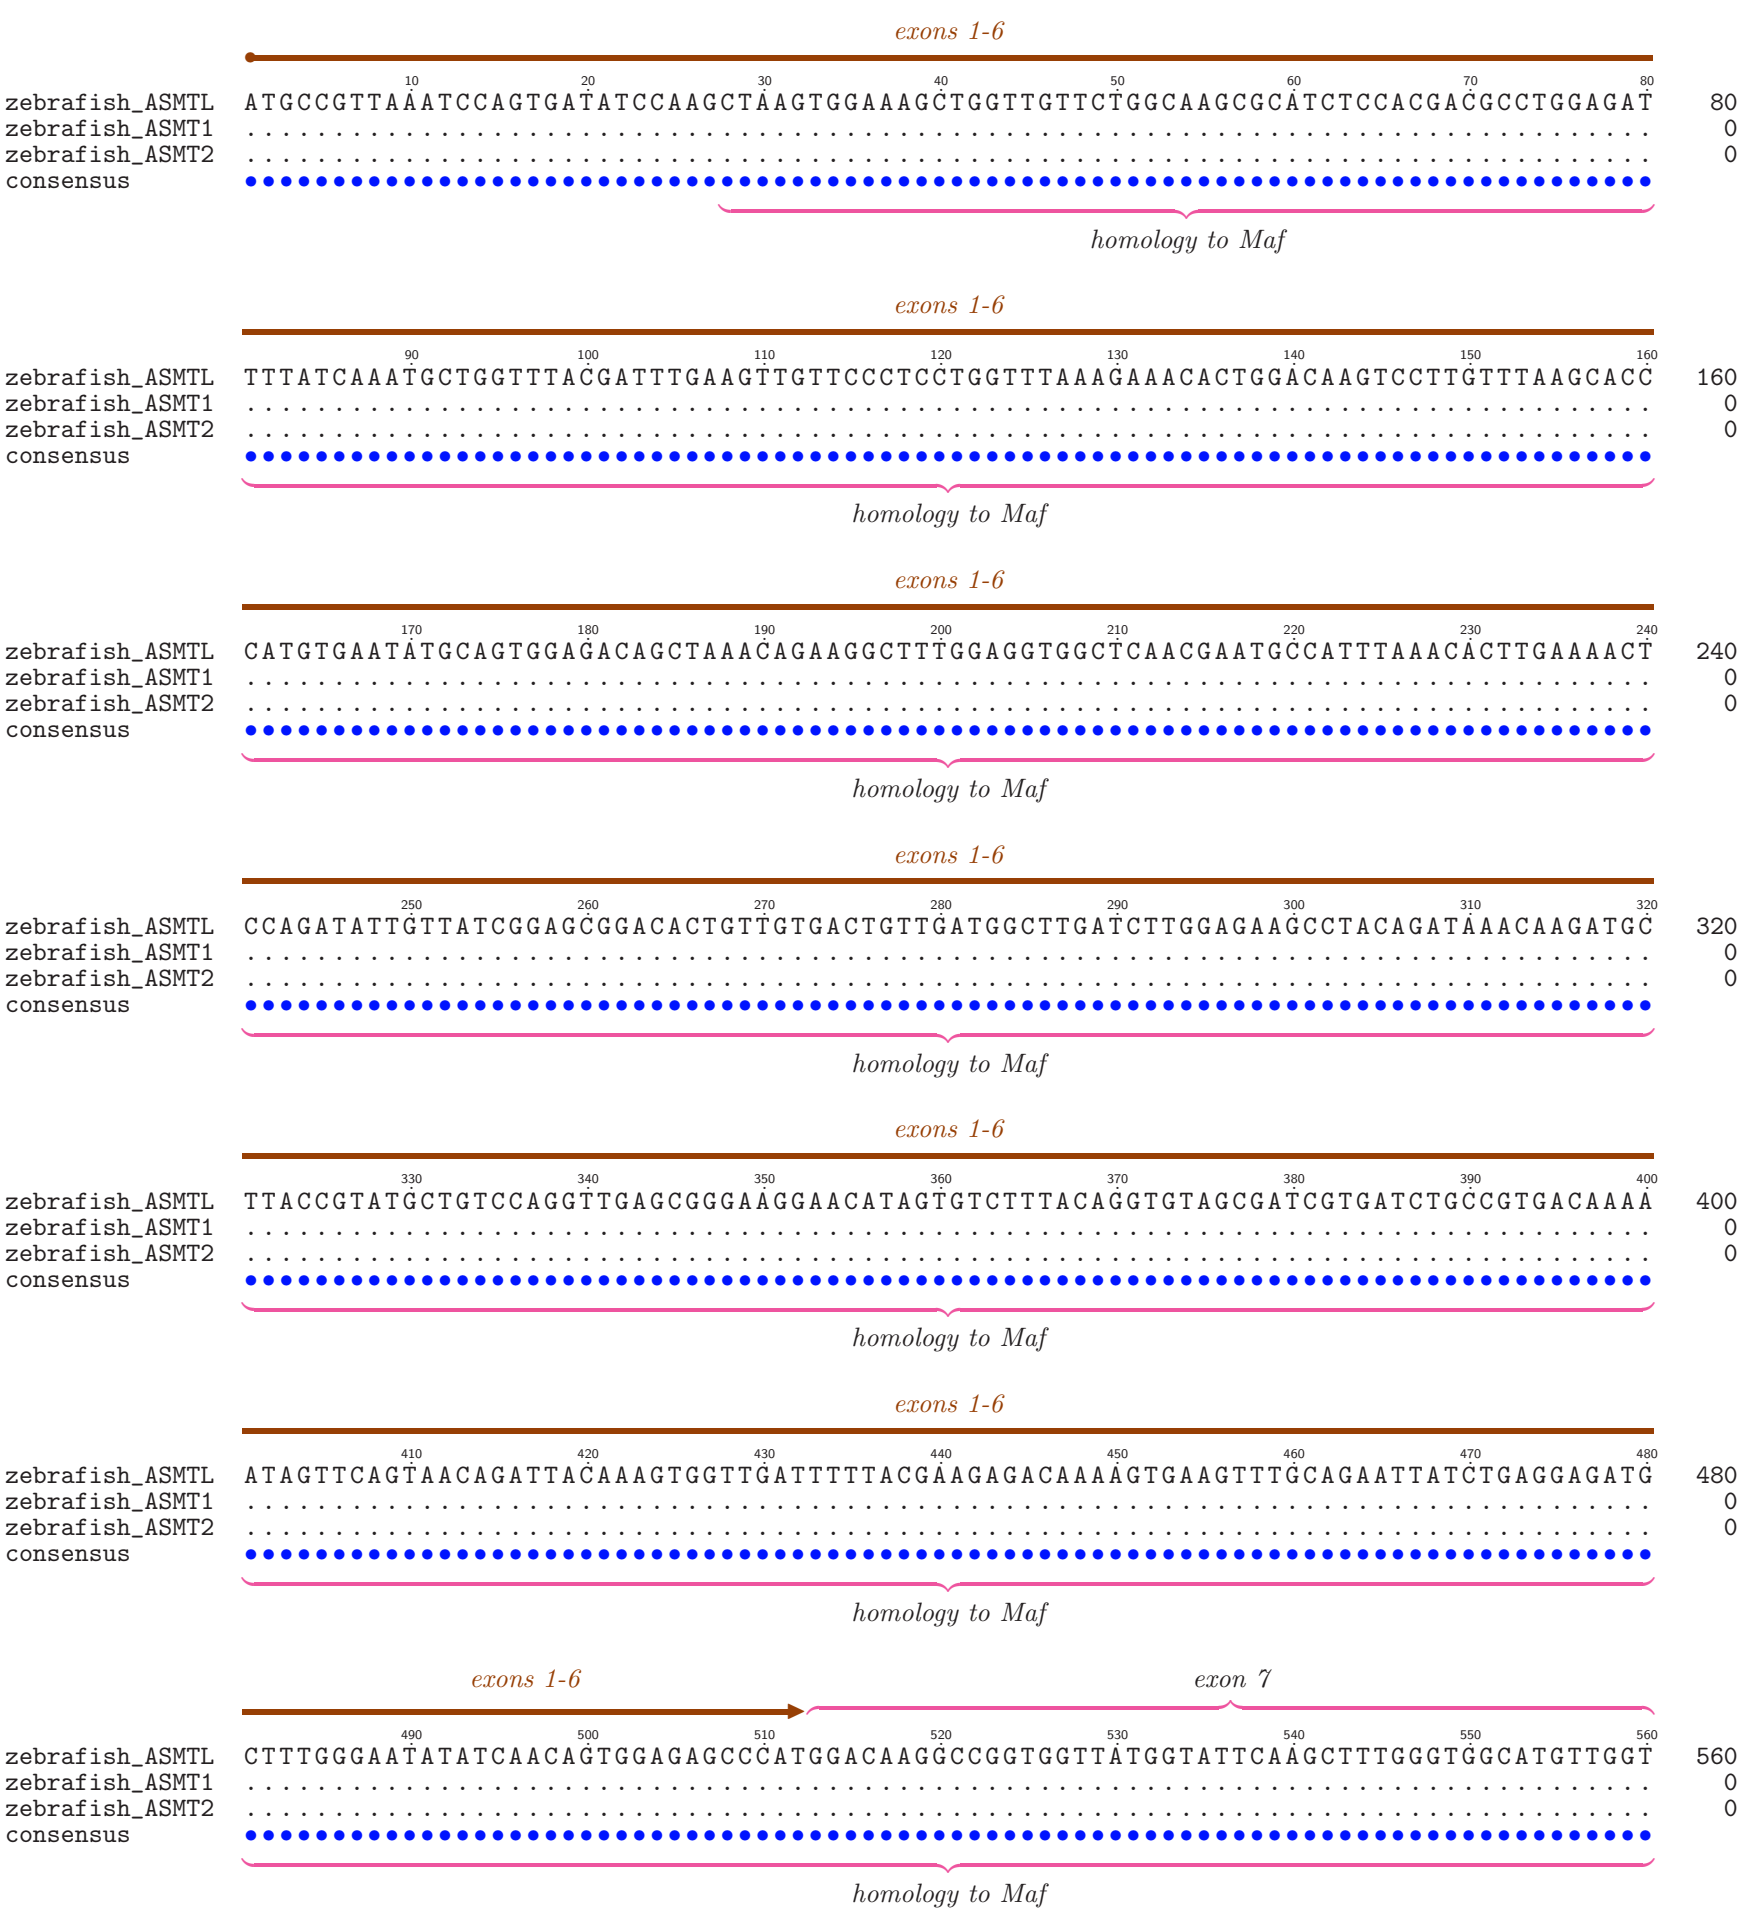

exon 7

|                 |                                                                                  |     |
|-----------------|----------------------------------------------------------------------------------|-----|
| zebrafish_ASMTL | GGAATATGTGCGAGGAGATTTTCTCAATGTAGTCGGCTTTCCTCTTAACCACTTCTGCAAGCAGTTGGGATCGATTTTCA | 640 |
| zebrafish_ASMT1 | .....                                                                            | 0   |
| zebrafish_ASMT2 | .....                                                                            | 0   |
| consensus       | .....                                                                            |     |

homology to Maf

exon 7

|                 |                                                                                   |     |
|-----------------|-----------------------------------------------------------------------------------|-----|
| zebrafish_ASMTL | ATAGTCCACCTGCAAGTCCTGCCCACAAAATCAAACGGGACTGCGATGAAGCTTGGACTCTTGTTAAACAAGACCACCAAT | 720 |
| zebrafish_ASMT1 | .....                                                                             | 0   |
| zebrafish_ASMT2 | .....                                                                             | 0   |
| consensus       | .....                                                                             |     |

homology to Maf

exon 7

|                 |                                                                                           |     |
|-----------------|-------------------------------------------------------------------------------------------|-----|
| zebrafish_ASMTL | GGGGATGTTGAGCTACTAGAAAATGTTAAAGATGACAGTTTGACATCTGTGCAAGAACAGAAATGTAATG <b>GGATTAGAGTT</b> | 800 |
| zebrafish_ASMT1 | .....                                                                                     | 0   |
| zebrafish_ASMT2 | .....                                                                                     | 13  |
| consensus       | .....                                                                                     |     |

homology to Maf

exon 7

exon 8

|                 |                                                                                                                                                                                                                                                                    |     |
|-----------------|--------------------------------------------------------------------------------------------------------------------------------------------------------------------------------------------------------------------------------------------------------------------|-----|
| zebrafish_ASMTL | <b>TGCCAAGTGC</b> <sup>810</sup> <b>AACAGACA</b> <sup>820</sup> <b>GGACGTC</b> <sup>830</sup> <b>CCCCACAG</b> .. <b>CATCATCAGC</b> <sup>840</sup> <b>TTGC</b> <sup>850</sup> <b>TGGATGGGTTCA</b> <sup>860</sup> <b>AAAGTATCA</b> <sup>870</sup> <b>AAGACTCTATT</b> | 878 |
| zebrafish_ASMT1 | .ATG.. <b>GCAGAAAGAA</b> <b>GGGAGCTGT</b> <b>ACCCCAAAAA</b> <b>GATCC</b> <b>TCGAATACA</b> <b>TGGAGGGTTCTGGT</b> <b>TCCAAGACTCTGTT</b>                                                                                                                              | 77  |
| zebrafish_ASMT2 | <b>TGTC</b> .. <b>CCAGAGTGAAC</b> <b>TGGACTATC</b> <b>CTTTCAA</b> .. <b>GCTTTT</b> <b>TGGAATATT</b> <b>TCAATGGA</b> <b>ATTCAGGATCTCT</b> <b>AAGGCGATATT</b>                                                                                                        | 89  |
| consensus       | .....                                                                                                                                                                                                                                                              |     |

exon 8

|                 |                                                                                                                                                                                                                                                                                                                                    |     |
|-----------------|------------------------------------------------------------------------------------------------------------------------------------------------------------------------------------------------------------------------------------------------------------------------------------------------------------------------------------|-----|
| zebrafish_ASMTL | <b>CA</b> <sup>880</sup> <b>CAGCA</b> <sup>890</sup> <b>ATCCA</b> <sup>900</sup> <b>AACTGA</b> <sup>910</sup> <b>AGGTGTT</b> <b>CGA</b> .. <b>TGTA</b> <sup>920</sup> <b>TTAAACA</b> <sup>930</sup> <b>CCCC</b> <sup>940</sup> <b>CTGGTG</b> <sup>950</sup> <b>GTCTAA</b> <b>CAATTG</b> <b>GAAGAGGT</b> <b>AGCTG</b> <b>GCCAGA</b> | 955 |
| zebrafish_ASMT1 | <b>CTCGGC</b> <b>TGTGAGCTGGGT</b> <b>TGTGTTTGA</b> .. <b>GCTCCT</b> <b>GCAGTCT</b> .. <b>GCGTGTCTGTCTGCT</b> <b>GGTCAGGT</b> <b>TTCTGCAGCTC</b>                                                                                                                                                                                    | 151 |
| zebrafish_ASMT2 | <b>TTCAGCT</b> <b>TGTGAGTTA</b> <b>AGGGTGTTCGA</b> <b>CCTGCTCCT</b> <b>CCAGTCCC</b> <b>AAAAGCCTCTGAGTGCAGCTGA</b> <b>AGTGGCAGAGCAGC</b>                                                                                                                                                                                            | 169 |
| consensus       | .....                                                                                                                                                                                                                                                                                                                              |     |

exon 8

|                 |                                                                                                                                                                                                                                                                                           |      |
|-----------------|-------------------------------------------------------------------------------------------------------------------------------------------------------------------------------------------------------------------------------------------------------------------------------------------|------|
| zebrafish_ASMTL | <b>TC</b> <sup>960</sup> <b>AAAG</b> <sup>970</sup> <b>CTTCTCTTTA</b> <sup>980</sup> <b>GGCACTG</b> <sup>990</sup> <b>AAAGGCTTCTGGA</b> <sup>1000</sup> <b>AGCCGCTG</b> <sup>1010</sup> <b>CTCCTTAGGCCT</b> <sup>1020</sup> <b>ACTAGAAAG</b> <sup>1030</sup> <b>GGTCA</b> <b>GA...CAG</b> | 1032 |
| zebrafish_ASMT1 | <b>TGAGCACCAGTGT</b> <b>TGGAC</b> <b>GGGACG</b> <b>GAGCGTCTGCTG</b> <b>TCTGCGTG</b> <b>TGTGGGCT</b> <b>TGCAGCTGCTCA</b> <b>ATAACACACACACACC</b>                                                                                                                                           | 231  |
| zebrafish_ASMT2 | <b>TTTGGCACCAGTCA</b> <b>AGAT</b> <b>GGCATTGAGCGTCTGCTG</b> <b>GATCTGATG</b> <b>GTTGCCAT</b> <b>TGAGATTGT</b> <b>TGGATGT</b> <b>GGAAGTG...GTG</b>                                                                                                                                         | 246  |
| consensus       | .....                                                                                                                                                                                                                                                                                     |      |

exon 8

exon 9

|                 |                                                                                                                                                                                                                                                                  |      |
|-----------------|------------------------------------------------------------------------------------------------------------------------------------------------------------------------------------------------------------------------------------------------------------------|------|
| zebrafish_ASMTL | <b>GA</b> <sup>1040</sup> <b>AGAGAT</b> <sup>1050</sup> <b>CAGTGT</b> <sup>1060</sup> <b>TGTACAGAA</b> <sup>1070</sup> <b>AATACAGAA</b> <sup>1080</sup> <b>CAGGC</b> <sup>1090</sup> <b>CAGT</b> <sup>1100</sup> <b>CTCTCTGCAT</b> <sup>1110</sup> <b>GGATTA</b> | 1112 |
| zebrafish_ASMT1 | <b>GACGGAA</b> <b>ACGTTCTGTACAGTAA</b> <b>CACAGAGATG</b> <b>TGCGAAT</b> <b>GTGTTTCTGGTCAAGTC</b> <b>CAGCCC</b> <b>GAAGTCTCTGTATCACTC</b>                                                                                                                         | 311  |
| zebrafish_ASMT2 | <b>CAGGGAA</b> <b>ACGCTCTTTATAG</b> <b>CAGTACAGATG</b> <b>TTGCTAATCTCTAC</b> <b>CCTGGCCAAAAG</b> <b>CAGCCC</b> <b>CAATCTCTGCATGATT</b>                                                                                                                           | 326  |
| consensus       | .....                                                                                                                                                                                                                                                            |      |

exon 9

|                 |                                                                                                                                                                                                                                                                                                                                          |      |
|-----------------|------------------------------------------------------------------------------------------------------------------------------------------------------------------------------------------------------------------------------------------------------------------------------------------------------------------------------------------|------|
| zebrafish_ASMTL | <b>TAT</b> <sup>1120</sup> <b>TC</b> <sup>1130</sup> <b>CCACTGCA</b> <sup>1140</sup> <b>ATGAT</b> <sup>1150</sup> <b>ATGGTGT</b> <sup>1160</sup> <b>GGCCTCTG</b> <sup>1170</sup> <b>TTCA</b> <sup>1180</sup> <b>AGTC</b> <sup>1190</sup> <b>ATCTAG</b> <b>AGAGCGCTGT</b> <b>AAGGGAG</b> <b>GGCA</b> <b>CCAG</b> <b>CCAA</b> <b>ACATG</b> | 1192 |
| zebrafish_ASMT1 | <b>TATCGAGTACAGCTC</b> <b>CAGAACCATCTAC</b> <b>CTGTGCTGGCATT</b> <b>ACCTGAGCGACCGCGT</b> <b>CCGAGAC</b> <b>GGGAAGA</b> <b>ACCAGTATG</b>                                                                                                                                                                                                  | 391  |
| zebrafish_ASMT2 | <b>GATCATT</b> <b>TATTC</b> <b>CTCTCAG</b> <b>ACCATCTAC</b> <b>CCGCTCTGGAACA</b> <b>ATCTGGT</b> <b>AGACGCTGT</b> <b>TAGGGA</b> <b>AGGAAGA</b> <b>ACCAGATG</b>                                                                                                                                                                            | 406  |
| consensus       | .....                                                                                                                                                                                                                                                                                                                                    |      |

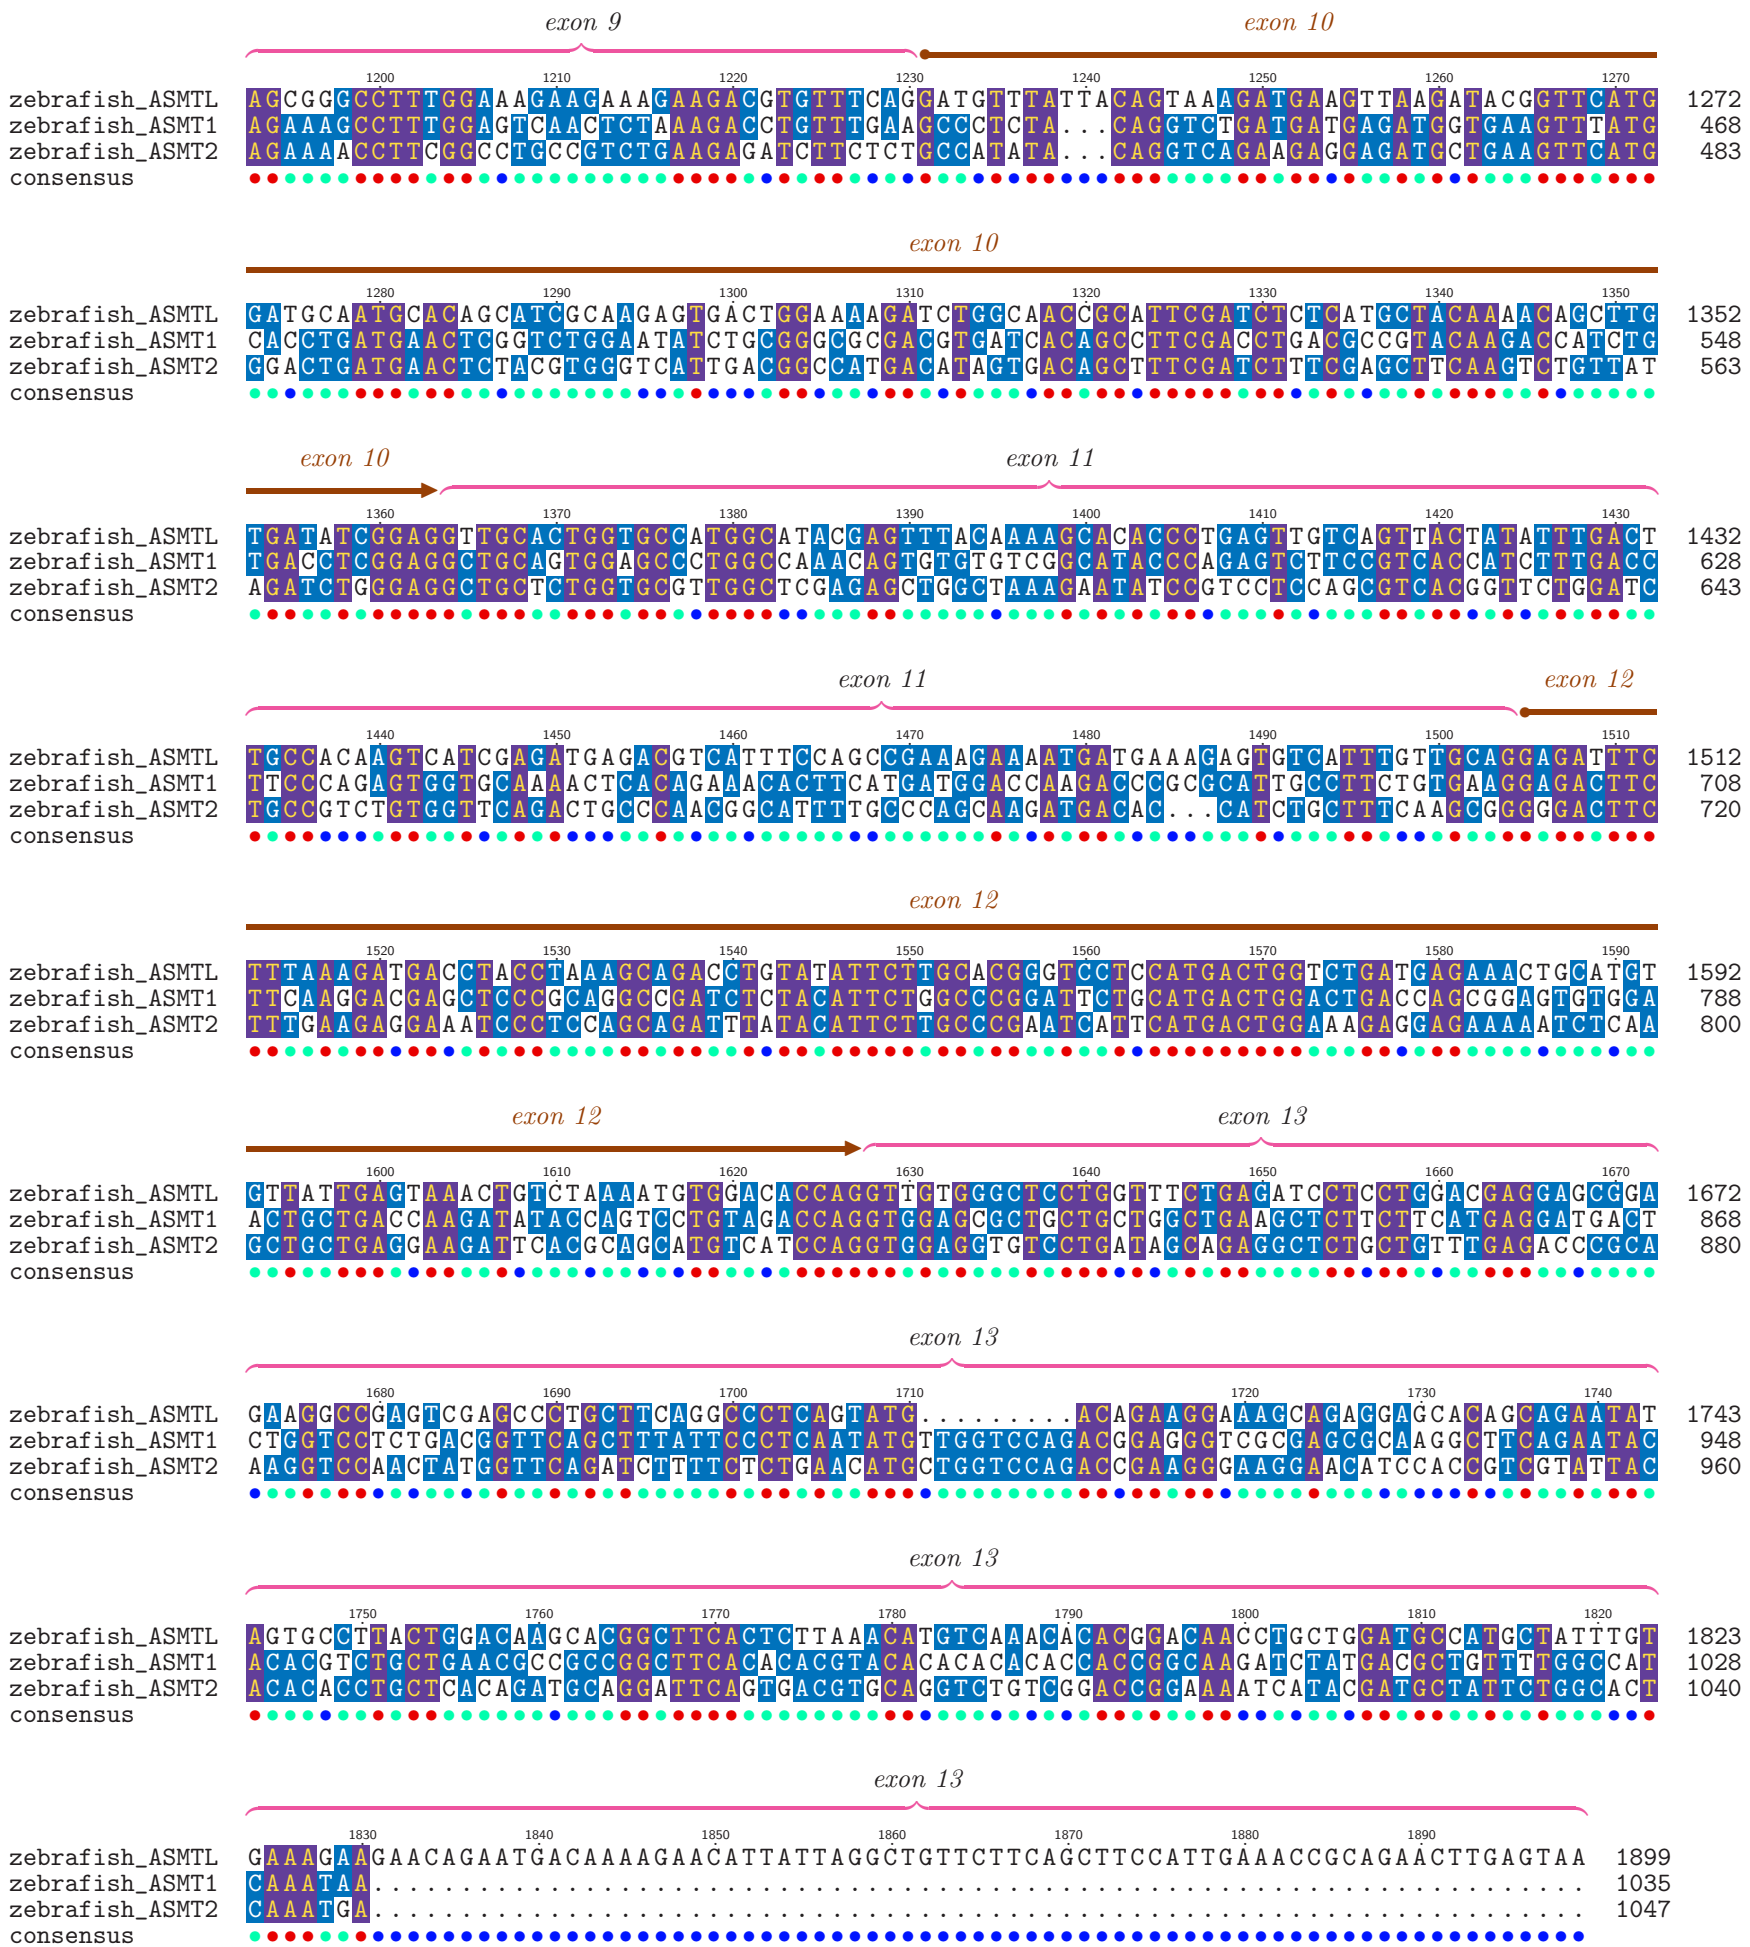

Supplement: s1 [file s1]
